# Supplementary material
Source: PubMed Central journal article supplement (PMC7773541)
Supplement: NIHMS1654446-supplement-Supplementary_Information.pdf [file NIHMS1654446-supplement-Supplementary_Information.pdf]

## Supporting Information

Kinetics of Glutathione Depletion and Antioxidant Gene Expression as Indicators of Chemical Modes of Action Assessed *in vitro* in Mouse Hepatocytes with Enhanced Glutathione Synthesis.

Fjodor Melnikov<sup>§§</sup>, Dianne Botta<sup>±§</sup>, Collin C. White<sup>±</sup>, Stefanie C. Schmuck<sup>±</sup>, Matthew Winfough<sup>‡</sup>, Christopher M. Schaupp<sup>±</sup>, Evan P. Gallagher<sup>±</sup>, Bryan W. Brooks<sup>||</sup>, Edward Spencer Williams<sup>||</sup>, Philip Coish<sup>§</sup>, Paul T. Anastas<sup>§‡</sup>, Adelina Voutchkova-Kostal<sup>‡</sup>, Jakub Kostal<sup>‡\*</sup>, Terrance J. Kavanagh<sup>±\*</sup>

<sup>§</sup>Yale School of Forestry and Environmental Sciences, Yale University, New Haven, CT 06520

<sup>±</sup>Department of Environmental and Occupational Health Sciences, University of Washington, Seattle, WA 98195

<sup>||</sup>Department of Environmental Science, Baylor University, Waco, TX 76798

<sup>‡</sup>Department of Chemistry, George Washington University, Washington, DC 20052

<sup>‡</sup>School of Public Health, Yale University, New Haven, CT 06520

### Table of Contents

|                                                                                                                                                                                      |       |
|--------------------------------------------------------------------------------------------------------------------------------------------------------------------------------------|-------|
| A. Concentration-response fit details .....                                                                                                                                          | p. S2 |
| B. Table S1: Multivariate changes in antioxidant gene expression between HV and CR cell lines for each chemical.....                                                                 | p. S2 |
| C. Table S2: Univariate changes in antioxidant gene expression between HV and CR cell lines.....                                                                                     | p. S3 |
| D. Table S3: Multivariate changes in antioxidant gene expression across all chemicals from 6 to 24 hr in response to sublethal chemical exposure.....                                | p. S4 |
| E. Table S3: Multivariate changes in antioxidant gene expression across all chemicals from 6 to 24 hr in response to sublethal chemical exposure.....                                | p. S5 |
| F. Figure S1: Schematic of Experimental Design .....                                                                                                                                 | p. S6 |
| G. Figure S2: GCLC and GCLM protein expression in HV and CR cell lines treated with vehicle, hydroquinone or perfluorooctanoic acid.....                                             | p. S7 |
| H. Figure S4: Correlation between GSH, mRNA and protein expression for GCLC and GCLM in HV and CR cell lines exposed to vehicle control, hydroquinone or perfluorooctanoic acid..... | p. S8 |
| I. References .....                                                                                                                                                                  | p. S9 |

**Concentration-response fit details.** Cytotoxicity Log AC<sub>50</sub> estimates were determined based on absolute concentration-response curve (CRC).<sup>1</sup> The curve plateaus were set to average reading from empty media plates and control cell wells. CRC were extrapolated beyond tested concentration ranges when E<sub>MAX</sub> was not reached in the concentration range tested. For example, tBHP is the least toxic of the 7 analyzed chemicals and does not reach 100% lethality in millimolar concentrations. On the contrary, Dinoseb was extremely potent but MTT fluorescence reading indicated that it did not decrease survival below 50% across wide concentration range above 30 uM. Upon manual examination it was clear that the cells were damaged and not functional – an observation that was not adequately captured by fluorescent reading. Thus, for DNSB cytotoxicity assessment, MTT fluorescence microplate reading from cell exposures to concentration above 30 uM were not use in the CRC fitting and the CRC was allowed to extrapolate the curve into concentrations above 30 uM. The consistent CRC boundaries allow for more exact AC<sub>50</sub> comparison, less influenced by solubility or selected concentration range.

Table S1: Multivariate changes in antioxidant gene expression between HV and CR cell lines for each chemical.

| <b>Chemical</b> | <b>Pillai<br/>Statistic</b> | <b>F-score</b> | <b>Pr(&gt;F)</b> |
|-----------------|-----------------------------|----------------|------------------|
| tBHQ            | 1.00                        | 1104.59        | 0.023            |
| HQ              | 1.00                        | 2365881.61     | 0.001            |
| CHP             | 1.00                        | 103.08         | 0.076            |
| tBHP            | 0.94                        | 2.02           | 0.498            |
| PFOA            | 0.27                        | 0.45           | 0.767            |
| BPA             | 0.85                        | 6.94           | 0.028            |
| DNSB            | 0.24                        | 0.40           | 0.802            |

Difference in overall gene expression profiles were established with Multivariate ANalysis of VARIance (MANOVA) using Pillai's trace for significance testing. P-values are corrected for multiple comparisons using family-wise error rate.

Table S2: Univariate changes in antioxidant gene expression between HV and CR cell lines

| Chem | Endpoint    | Time | Effect in<br>CR $\Delta\Delta E$ | Effect in<br>HV $\Delta\Delta E$ | Difference<br>in $\Delta\Delta E$ at<br>(HV-CR) | p.adj |
|------|-------------|------|----------------------------------|----------------------------------|-------------------------------------------------|-------|
| BPA  | <i>gclc</i> | 24   | -0.22                            | -0.05                            | 0.17                                            | 0.156 |
| BPA  | <i>gclm</i> | 24   | -0.07                            | -0.04                            | 0.03                                            | 0.834 |
| BPA  | <i>hmox</i> | 24   | -0.14                            | 0.11                             | 0.25                                            | 0.101 |
| BPA  | <i>nqo1</i> | 24   | -0.01                            | 0.21                             | 0.22                                            | 0.130 |
| CHP  | <i>gclc</i> | 6    | 0.12                             | 0.12                             | 0.00                                            | 0.998 |
| CHP  | <i>gclc</i> | 24   | 0.19                             | 0.44                             | 0.25                                            | 0.121 |
| CHP  | <i>gclm</i> | 6    | 0.31                             | 0.28                             | -0.03                                           | 0.885 |
| CHP  | <i>gclm</i> | 24   | 0.26                             | 0.53                             | 0.26                                            | 0.109 |
| CHP  | <i>hmox</i> | 6    | 0.88                             | 1.15                             | 0.27                                            | 0.330 |
| CHP  | <i>hmox</i> | 24   | 0.52                             | 0.93                             | 0.41                                            | 0.101 |
| CHP  | <i>nqo1</i> | 6    | 0.23                             | 0.26                             | 0.03                                            | 0.834 |
| CHP  | <i>nqo1</i> | 24   | 0.30                             | 0.64                             | 0.34                                            | 0.162 |
| DNSB | <i>gclc</i> | 24   | 0.19                             | 0.31                             | 0.12                                            | 0.376 |
| DNSB | <i>gclm</i> | 24   | 0.21                             | 0.25                             | 0.04                                            | 0.772 |
| DNSB | <i>hmox</i> | 24   | 0.56                             | 0.62                             | 0.06                                            | 0.834 |
| DNSB | <i>nqo1</i> | 24   | 0.18                             | 0.27                             | 0.08                                            | 0.543 |
| HQ   | <i>gclc</i> | 6    | 0.31                             | 0.79                             | 0.48                                            | 0.005 |
| HQ   | <i>gclc</i> | 24   | 0.08                             | 0.46                             | 0.38                                            | 0.101 |
| HQ   | <i>gclm</i> | 6    | 0.57                             | 0.77                             | 0.20                                            | 0.083 |
| HQ   | <i>gclm</i> | 24   | 0.38                             | 0.64                             | 0.26                                            | 0.101 |
| HQ   | <i>hmox</i> | 6    | 1.82                             | 2.01                             | 0.19                                            | 0.049 |
| HQ   | <i>hmox</i> | 24   | 1.17                             | 1.82                             | 0.65                                            | 0.005 |
| HQ   | <i>nqo1</i> | 6    | 0.38                             | 0.35                             | -0.02                                           | 0.834 |
| HQ   | <i>nqo1</i> | 24   | 0.88                             | 1.18                             | 0.30                                            | 0.112 |
| PFOA | <i>gclc</i> | 24   | -0.14                            | -0.14                            | 0.00                                            | 0.998 |
| PFOA | <i>gclm</i> | 24   | -0.07                            | -0.10                            | -0.02                                           | 0.812 |
| PFOA | <i>hmox</i> | 24   | -0.17                            | -0.14                            | 0.04                                            | 0.568 |
| PFOA | <i>nqo1</i> | 24   | -0.03                            | -0.06                            | -0.03                                           | 0.830 |
| tBHP | <i>gclc</i> | 6    | 0.00                             | 0.05                             | 0.06                                            | 0.475 |
| tBHP | <i>gclc</i> | 24   | -0.29                            | -0.16                            | 0.12                                            | 0.376 |
| tBHP | <i>gclm</i> | 6    | 0.20                             | 0.28                             | 0.08                                            | 0.346 |
| tBHP | <i>gclm</i> | 24   | -0.15                            | -0.01                            | 0.14                                            | 0.374 |
| tBHP | <i>hmox</i> | 6    | 0.59                             | 0.86                             | 0.28                                            | 0.169 |
| tBHP | <i>hmox</i> | 24   | -0.25                            | 0.06                             | 0.31                                            | 0.186 |
| tBHP | <i>nqo1</i> | 6    | 0.13                             | 0.19                             | 0.06                                            | 0.341 |
| tBHP | <i>nqo1</i> | 24   | -0.13                            | 0.06                             | 0.19                                            | 0.374 |
| tBHQ | <i>gclc</i> | 6    | 0.12                             | 0.69                             | 0.57                                            | 0.001 |

|      |             |    |       |      |      |       |
|------|-------------|----|-------|------|------|-------|
| tBHQ | <i>gclc</i> | 24 | -0.02 | 0.22 | 0.24 | 0.070 |
| tBHQ | <i>gclm</i> | 6  | 0.43  | 0.66 | 0.23 | 0.036 |
| tBHQ | <i>gclm</i> | 24 | 0.36  | 0.55 | 0.19 | 0.011 |
| tBHQ | <i>hmox</i> | 6  | 1.42  | 1.88 | 0.46 | 0.005 |
| tBHQ | <i>hmox</i> | 24 | 0.75  | 1.30 | 0.55 | 0.101 |
| tBHQ | <i>nqo1</i> | 6  | 0.22  | 0.47 | 0.25 | 0.101 |
| tBHQ | <i>nqo1</i> | 24 | 0.73  | 1.13 | 0.40 | 0.002 |

Table S3: Multivariate changes in antioxidant gene expression across all chemicals from 6 to 24 hr in response to sublethal chemical exposure.

| <b>Gene</b> | <b>Cell line</b> | <b>Pillai</b> | <b>F-Score</b> | <b>Pr(&gt;F)</b> |
|-------------|------------------|---------------|----------------|------------------|
| <i>Gclc</i> | HV               | 0.913446      | 13.19192       | 0.036            |
| <i>Gclc</i> | CR               | 0.778847      | 4.402198       | 0.18             |
| <i>Gclm</i> | HV               | 0.709742      | 3.056517       | 0.18             |
| <i>Gclm</i> | CR               | 0.895029      | 10.65803       | 0.046            |
| <i>Hmox</i> | HV               | 0.790072      | 4.70442        | 0.18             |
| <i>Hmox</i> | CR               | 0.96225       | 31.86248       | 0.006            |
| <i>Nqo1</i> | HV               | 0.978375      | 56.55384       | 0.002            |
| <i>Nqo1</i> | CR               | 0.978272      | 56.27903       | 0.002            |

Difference in overall gene expression profiles were established with Multivariate ANalysis of VAriance (MANOVA) using Pillai's trace for significance testing. P-values are corrected for multiple comparisons using family-wise error rate.

Table S4: Univariate changes in antioxidant gene expression from 6 to 24 hr in response to sublethal chemical concentrations and separated by cell line.

| Chem | Endpoint | Cell line | Effect at 6 hr $\Delta\Delta E$ | Effect at 24 hr $\Delta\Delta E$ | Difference in $\Delta\Delta E$ (24 hr - 6 hr) | p.adj |
|------|----------|-----------|---------------------------------|----------------------------------|-----------------------------------------------|-------|
| HQ   | nqo1     | HV        | 0.35                            | 1.18                             | 0.83                                          | 0.000 |
| HQ   | nqo1     | CR        | 0.38                            | 0.88                             | 0.50                                          | 0.019 |
| HQ   | hmox     | HV        | 2.01                            | 1.82                             | -0.19                                         | 0.109 |
| HQ   | hmox     | CR        | 1.82                            | 1.17                             | -0.65                                         | 0.001 |
| HQ   | gclc     | HV        | 0.79                            | 0.46                             | -0.33                                         | 0.008 |
| HQ   | gclc     | CR        | 0.31                            | 0.08                             | -0.22                                         | 0.211 |
| HQ   | gclm     | HV        | 0.77                            | 0.64                             | -0.13                                         | 0.100 |
| HQ   | gclm     | CR        | 0.57                            | 0.38                             | -0.19                                         | 0.157 |
| tBHQ | nqo1     | HV        | 0.47                            | 1.13                             | 0.66                                          | 0.002 |
| tBHQ | nqo1     | CR        | 0.22                            | 0.73                             | 0.51                                          | 0.002 |
| tBHQ | hmox     | HV        | 1.88                            | 1.30                             | -0.58                                         | 0.060 |
| tBHQ | hmox     | CR        | 1.42                            | 0.75                             | -0.67                                         | 0.001 |
| tBHQ | gclc     | HV        | 0.69                            | 0.22                             | -0.47                                         | 0.003 |
| tBHQ | gclc     | CR        | 0.12                            | -0.02                            | -0.14                                         | 0.086 |
| tBHQ | gclm     | HV        | 0.66                            | 0.55                             | -0.11                                         | 0.109 |
| tBHQ | gclm     | CR        | 0.43                            | 0.36                             | -0.07                                         | 0.336 |
| CHP  | nqo1     | HV        | 0.26                            | 0.64                             | 0.38                                          | 0.100 |
| CHP  | nqo1     | CR        | 0.23                            | 0.30                             | 0.07                                          | 0.633 |
| CHP  | hmox     | HV        | 1.15                            | 0.93                             | -0.22                                         | 0.432 |
| CHP  | hmox     | CR        | 0.88                            | 0.52                             | -0.35                                         | 0.070 |
| CHP  | gclc     | HV        | 0.12                            | 0.44                             | 0.31                                          | 0.100 |
| CHP  | gclc     | CR        | 0.12                            | 0.19                             | 0.06                                          | 0.643 |
| CHP  | gclm     | HV        | 0.28                            | 0.53                             | 0.25                                          | 0.162 |
| CHP  | gclm     | CR        | 0.31                            | 0.26                             | -0.04                                         | 0.713 |
| tBHP | nqo1     | HV        | 0.19                            | 0.06                             | -0.13                                         | 0.451 |
| tBHP | nqo1     | CR        | 0.13                            | -0.13                            | -0.26                                         | 0.070 |
| tBHP | hmox     | HV        | 0.86                            | 0.06                             | -0.81                                         | 0.008 |
| tBHP | hmox     | CR        | 0.59                            | -0.25                            | -0.84                                         | 0.001 |
| tBHP | gclc     | HV        | 0.05                            | -0.16                            | -0.22                                         | 0.060 |
| tBHP | gclc     | CR        | 0.00                            | -0.29                            | -0.28                                         | 0.049 |
| tBHP | gclm     | HV        | 0.28                            | -0.01                            | -0.30                                         | 0.041 |
| tBHP | gclm     | CR        | 0.20                            | -0.15                            | -0.36                                         | 0.022 |

Figure S1. Schematic of Experimental Design

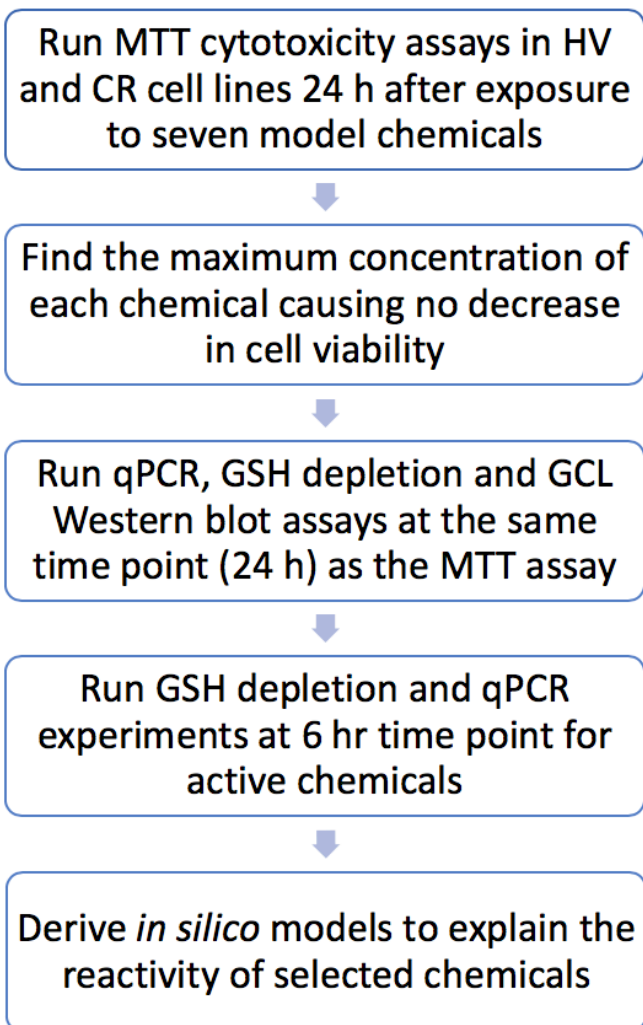

Figure S2. GCLC and GCLM protein expression in HV and CR cell lines treated with vehicle control, 100  $\mu$ M hydroquinone or 100  $\mu$ M perfluorooctanoic acid. Panel A: Representative Western immunoblot showing bands for GCLC, GCLM and  $\beta$ -Actin. Lanes for vehicle control (Con), hydroquinone (HQ) and perfluorooctanoic acid (PFOA) are indicated. Quantitation of GCLC (Panel B) and GCLM (Panel C) band optical density represented as a percentage of  $\beta$ -Actin optical density. N=3 independent experiments. \*Statistically significant difference ( $p < 0.05$ ) between HV and CR cell lines within treatments. #Statistically significant difference ( $p < 0.05$ ) between control and treated samples within HV or CR cell lines.

A.

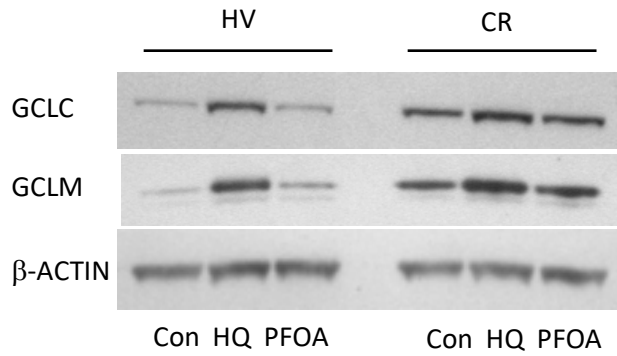

B.

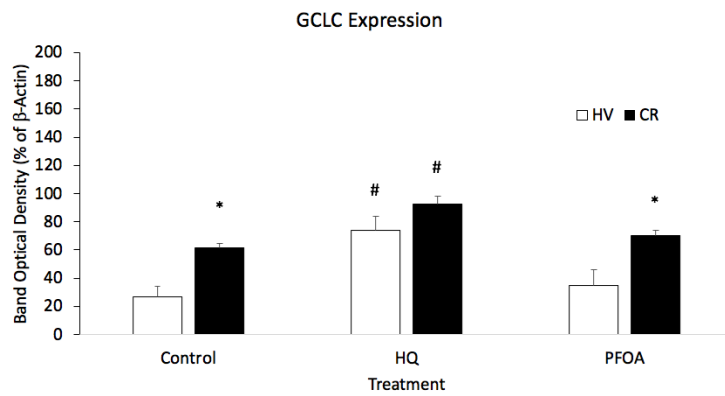

C.

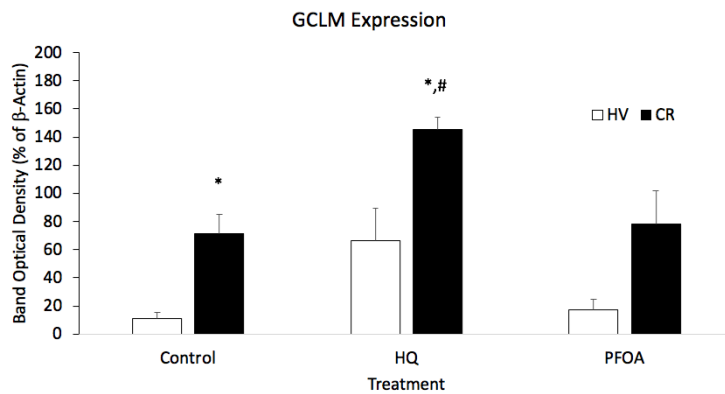

Figure S3. Correlations between GCLC and GCLM mRNA expression, and GCLC and GCLM protein expression in HV and CR cell lines exposed to vehicle control, 100 uM hydroquinone or 100 uM perfluorooctanoic acid. GCLC and GCLM mRNA expression are plotted as a percentage of  $\beta$ -Actin mRNA. GCLC and GCLM protein expression are plotted as a percentage of  $\beta$ -Actin protein. Symbols for vehicle control (Control), hydroquinone (HQ) and perfluorooctanoic acid (PFOA) are indicated. N=3 independent experiments.

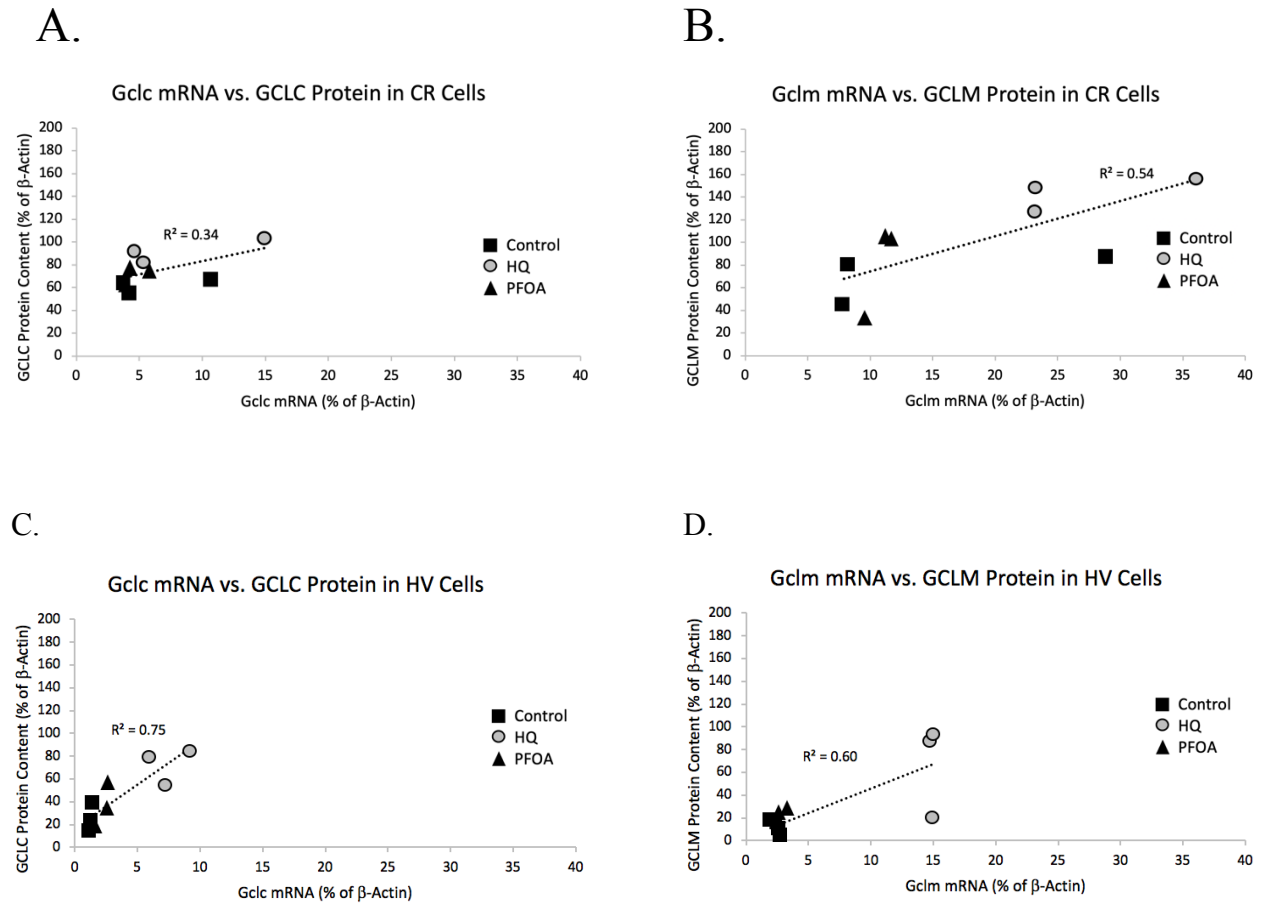



Figure S4. Correlations between GCLC and GCLM protein expression and GSH content in HV and CR cell lines exposed to vehicle control, 100  $\mu$ M hydroquinone or 100  $\mu$ M perfluorooctanoic acid. GCLC and GCLM protein expression are plotted as a percentage of  $\beta$ -Actin protein. GSH levels were measured by the NDA assay. Symbols for vehicle control (Control), hydroquinone (HQ) and perfluorooctanoic acid (PFOA) are indicated. N=3 independent experiments.

A.

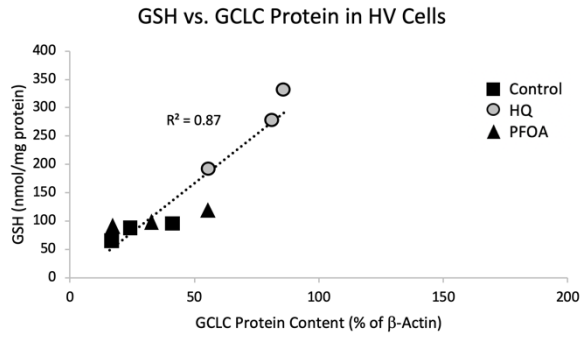

B.

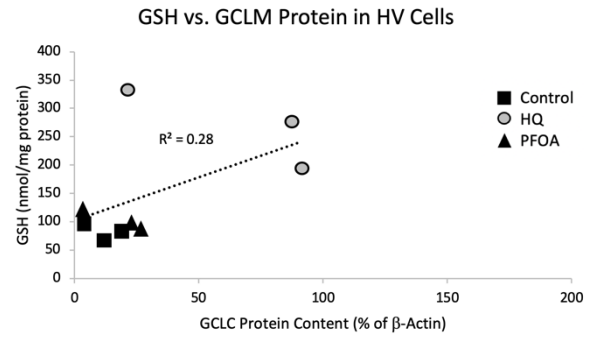

C.

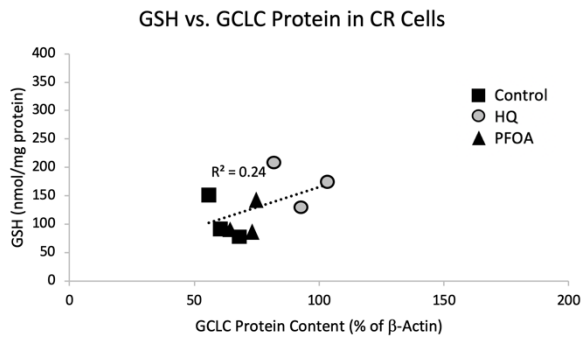

D.

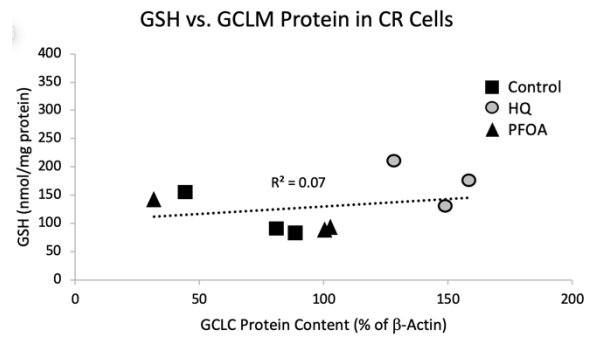

## References

- (1) Sebaugh, J. L. (2011) Guidelines for accurate EC50/IC50 estimation. *Pharm. Stat.* 10, 128–134.
